# Supplementary material
Source: PubMed Central journal article supplement (PMC5744683)

**Supporting Information**

**Investigation of the Complete Suite of Leucine and Isoleucine  
Isomers: Toward Prediction of Ion Mobility Separation  
Capabilities**

James N. Dodds,<sup>1</sup> Jody C. May,<sup>1</sup> and John A. McLean<sup>1</sup>

1. Department of Chemistry, Center for Innovative Technology, Vanderbilt Institute of Chemical Biology, and Vanderbilt Institute for Integrative Biosystems Research and Education, Vanderbilt University, Nashville, TN

Email: john.a.mclean@vanderbilt.edu

***Comments on measuring CCS and Ion Mobility Distributions Presented in this Work***

All IM-MS measurements in this study were obtained in positive ionization mode utilizing incremental steps of increasing drift field in the mobility portion of the Agilent 6560 IM-MS with nitrogen as the drift gas. After the non-mobility flight times (*i.e.* dead times) were subtracted at each voltage and the collision cross section for each analyte was calculated, the equation shown in Figure S3 was used to convert the time component of the experiment (x axis) to CCS. The optimal drift field occurs at 14.7 V/cm for the analytes examined in this study (see Figure S2), and hence the distributions at this drift field are presented in Figures S4 and S5. All theoretical (modeled) spectra are generated using Equation 4 of the main text.

Supplemental Material

**Figure S1-** CID fragmentation spectra for the leucine/isoleucine isomers investigated in this work. Fragmentation data was obtained using the QTOF stage of the IM-MS instrument after extracting the mobility of the precursor ion ( $m/z$  132.1). Fragmentation energy was kept constant at 20 eV (laboratory frame).

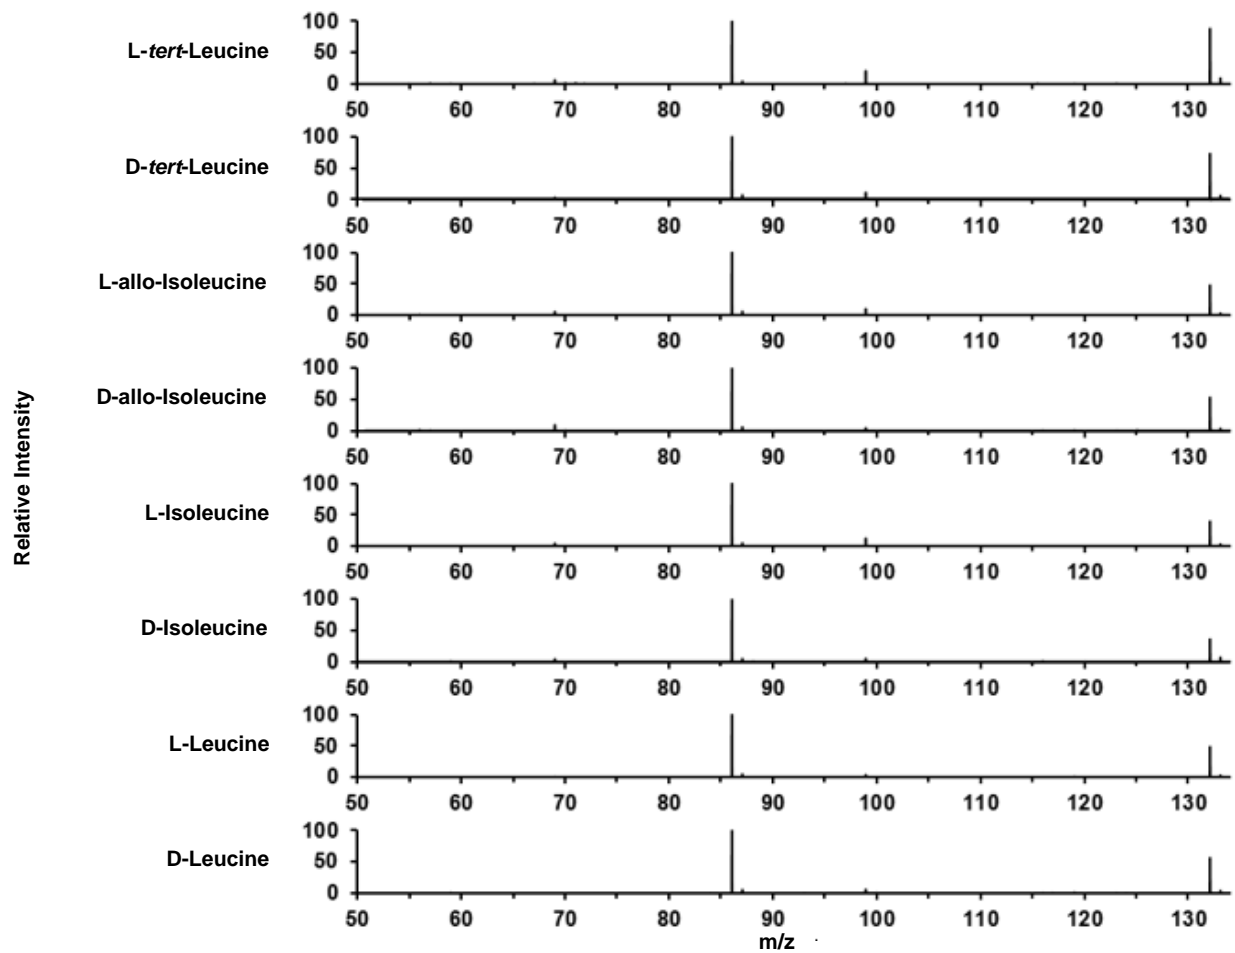

**Figure S2-** An overlaid IM spectrum obtained at different drift fields which demonstrates the separation of a mixture of L-norleucine and L-isoleucine for various applied drift fields. The optimal separation occurs at the maximum observed resolving power, here 61 resolving power at 14.7 V/cm, which results in a *ca.* 50% valley for this isomer pair.

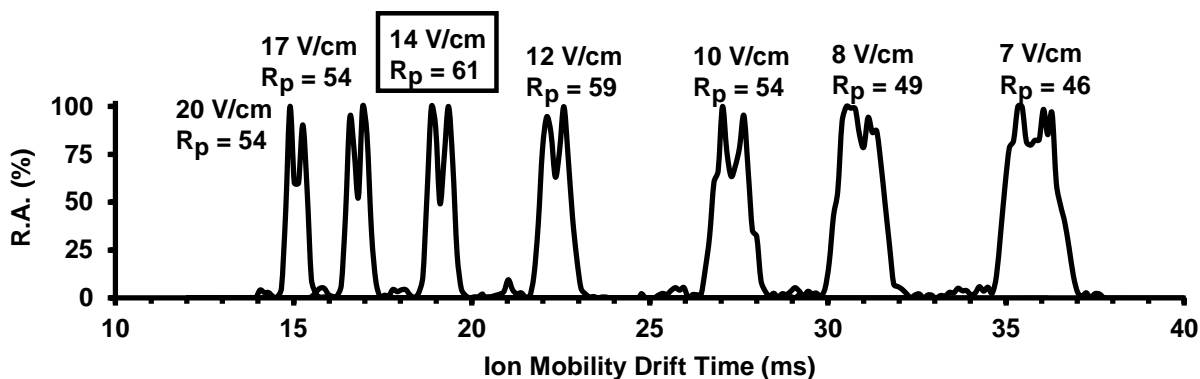

**Table S1-** Cross section data for each isomer of  $C_6H_{13}NO_2$  investigated in this work. The standard deviation of the CCS for each measurement (RSD *ca.* 0.2%) is included in addition to the corresponding reduced mobility ( $k_0$ ), drift time, FWHM, and resolving power.

| Molecule            | CCS ( $\text{\AA}^2$ ) | $\sigma$ CCS ( $\text{\AA}^2$ ) | $t_d$ (14.7 V/cm) | FWHM (ms) | $K_0$ ( $\text{cm}^2/\text{V s}$ ) | $R_p$ |
|---------------------|------------------------|---------------------------------|-------------------|-----------|------------------------------------|-------|
| D-Leucine           | 135.2                  | 0.3                             | 19.14             | 0.32      | 1.634                              | 59.8  |
| L-Leucine           | 135.1                  | 0.3                             | 19.1              | 0.34      | 1.635                              | 56.2  |
| D-Isoleucine        | 133.3                  | 0.3                             | 18.9              | 0.33      | 1.658                              | 57.3  |
| L-Isoleucine        | 133.5                  | 0.3                             | 18.89             | 0.32      | 1.655                              | 59.0  |
| D-allo-Isoleucine   | 133.1                  | 0.3                             | 18.87             | 0.30      | 1.66                               | 62.9  |
| L-allo-Isoleucine   | 132.9                  | 0.2                             | 18.87             | 0.32      | 1.663                              | 59.0  |
| D-tert-Leucine      | 132.5                  | 0.2                             | 18.76             | 0.34      | 1.668                              | 55.2  |
| L-tert-Leucine      | 132.4                  | 0.3                             | 18.77             | 0.33      | 1.669                              | 56.9  |
| L-Norleucine        | 136.6                  | 0.3                             | 19.35             | 0.32      | 1.617                              | 60.5  |
| 6-Aminocaproic Acid | 129.3                  | 0.2                             | 18.27             | 0.30      | 1.709                              | 60.9  |
| N-N-Dimethylglycine | 127.5                  | 0.3                             | 18.15             | 0.32      | 1.732                              | 56.7  |

**Figure S3-** Linear correlation between drift time and collision cross section obtained from the Mason-Schamp equation (below) for isomers analyzed in this study. Drift times correlate to peak centroids at 14.7 V/cm in a uniform field instrument. Error bars indicate the uncertainty in the CCS measurement.

$$\Omega = \frac{3Ze_c}{16N} * \left(\frac{2\pi}{k_bT}\right)^{\frac{1}{2}} * \left(\frac{m_{ion}+m_{gas}}{m_{ion}*m_{gas}}\right)^{\frac{1}{2}} * \left(\frac{V*t_d}{L^2} * \frac{273.15^{\circ}C}{T} * \frac{P}{760 \text{ torr}}\right)$$

Cross sections were obtained by calculating the corrected drift time and incorporating various laboratory parameters of the experiment including ion mass ( $m_{ion}$ ), gas mass ( $m_{gas}$ ), drift voltage (V), drift tube length (L), temperature (T) and pressure (P).

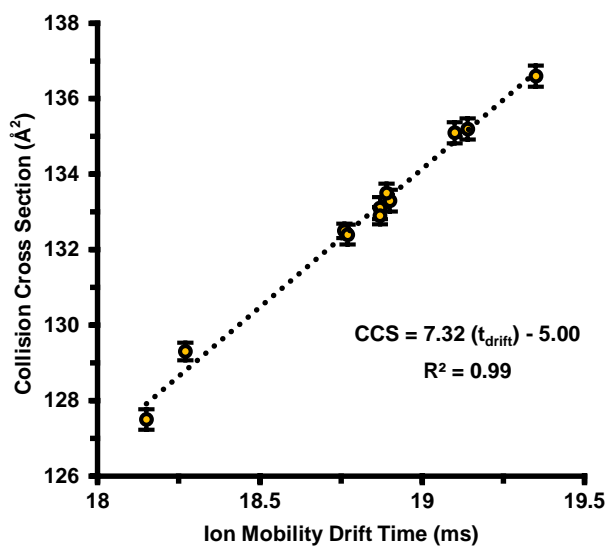

**Figure S4-** Individual drift spectra from Figure 2B with dotted lines to indicate the range of CCS data.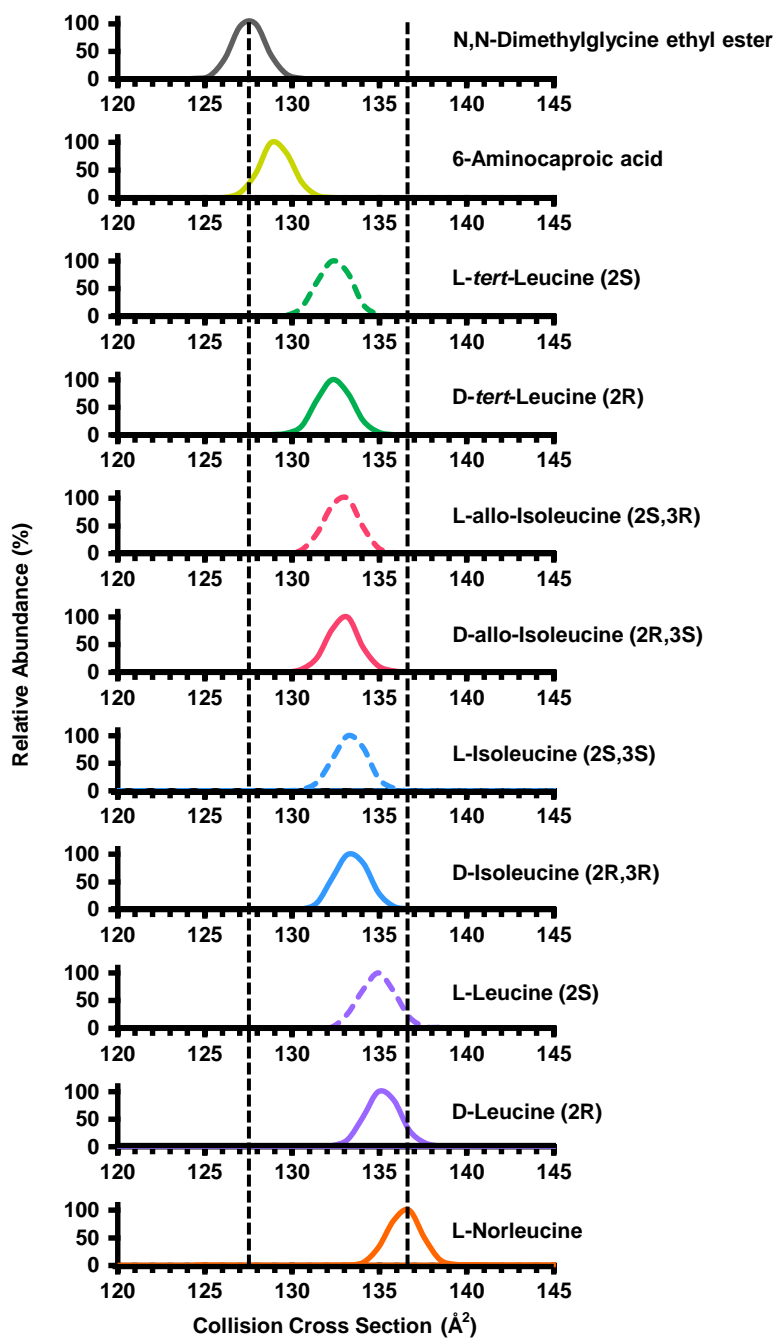

Supplemental Material

**Figure S5-** (A) Individual overlays and mixtures for panels B-IV and B-V from Figure 2. Note the discrepancy between separations of overlays (colored spectra) and analytical mixtures (black traces). (B) For comparison, panels VI and VII represent the enantiomer pairs for the other isomers overlaid to the left in (A). Another representative enantiomer comparison is depicted in VIII for reference.

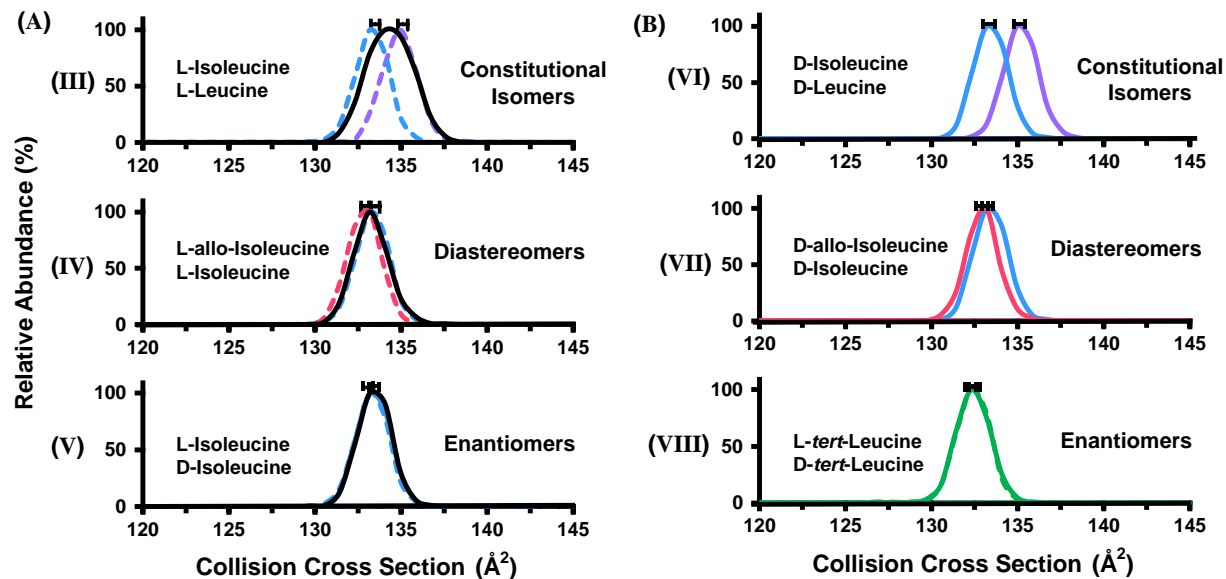

## Supplemental Material

**Figure S6-** Comparison highlighting the effect of isomer abundance ratios on separation efficiency. Abundance ratios have significantly more of an impact on separation efficiency for more difficult separations (i.e. lower percent difference in CCS). For isomers that are 2-1.5% different in CCS both compounds are distinguishable in a 3:1 ratio at 100 resolving power. As the molecules become more structurally similar (similar cross sections, and hence lower percent difference) the isomer ratio becomes increasingly more important in order to observe both species in a mixture.

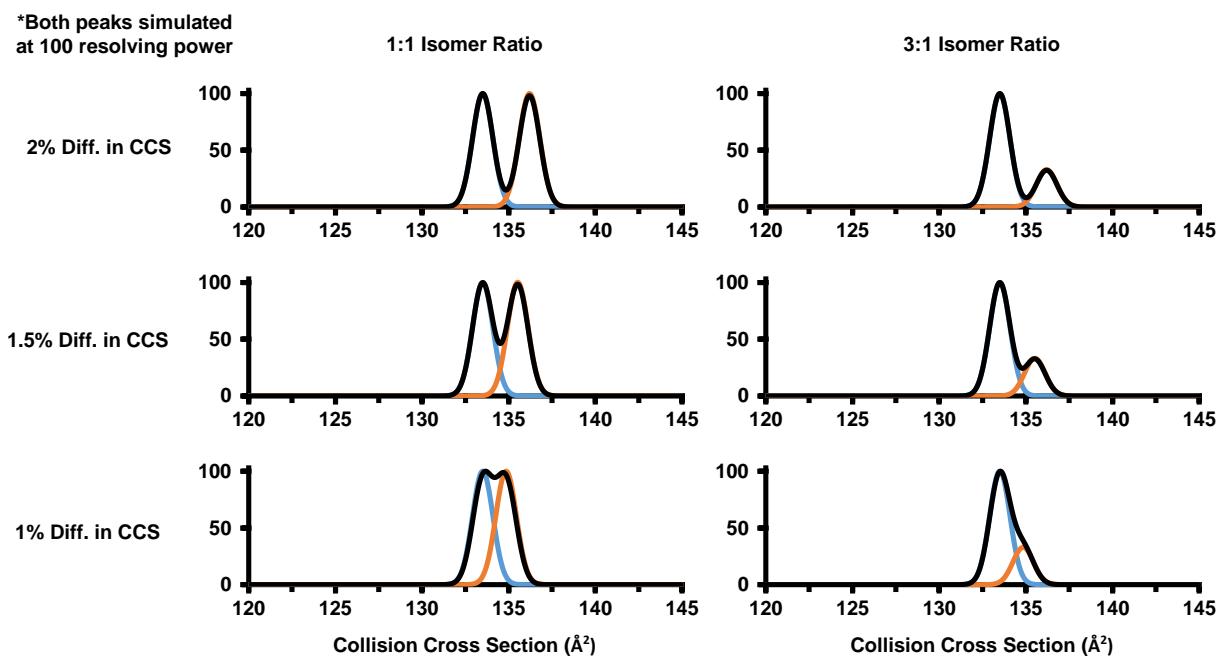

Supplement: NIHMS926787-supplement-Supplemental_materials.pdf [file NIHMS926787-supplement-Supplemental_materials.pdf]
